# Supplementary material
Source: publisher site journal article supplement (https://www.dovepress.com/article/403512)
Supplement: Supplementary file 1 [file get_supplementary_file.php]

Supplementary materials

Table S1 The accuracies from the visual search experiment: Mean(SD)

| Search target | Modification group (N=36) | | Waitlist group (N=37) | |
| --- | --- | --- | --- | --- |
| Pre-training | Post-training | Pre-training | Post-training |
| Happy face | 0.89(0.14) | 0.86(0.11) | 0.90(0.13) | 0.88(0.15) |
| Angry face | 0.72(0.11) | 0.72(0.11) | 0.76(0.13) | 0.74(0.12) |

Table S2 The reaction times (ms) from the visual search experiment: Mean(SD)

| Search target | Modification group (N=36) | | Waitlist group (N=37) | |
| --- | --- | --- | --- | --- |
| Pre-training | Post-training | Pre-training | Post-training |
| Happy face | 1169.25(434.34) | 886.92(340.72) | 1119.87(441.78) | 1076.41(418.25) |
| Angry face | 1663.69(546.08) | 961.07(419.69) | 1527.52(517.32) | 1384.10(487.73) |
